# Supplementary material
Source: PubMed Central journal article supplement (PMC2994938)

**Supplementary Figure 1.** PAR levels in wild-type MEFs. Treatment of wild-type MEFs with cisplatin for 2 hours (lanes 3, 4), pre-treatment with Parp inhibitor, DPQ (lanes 2, 4) or following 48 hours of serum starvation on the levels of PAR determined by western blot, as a measure of Parp activity.

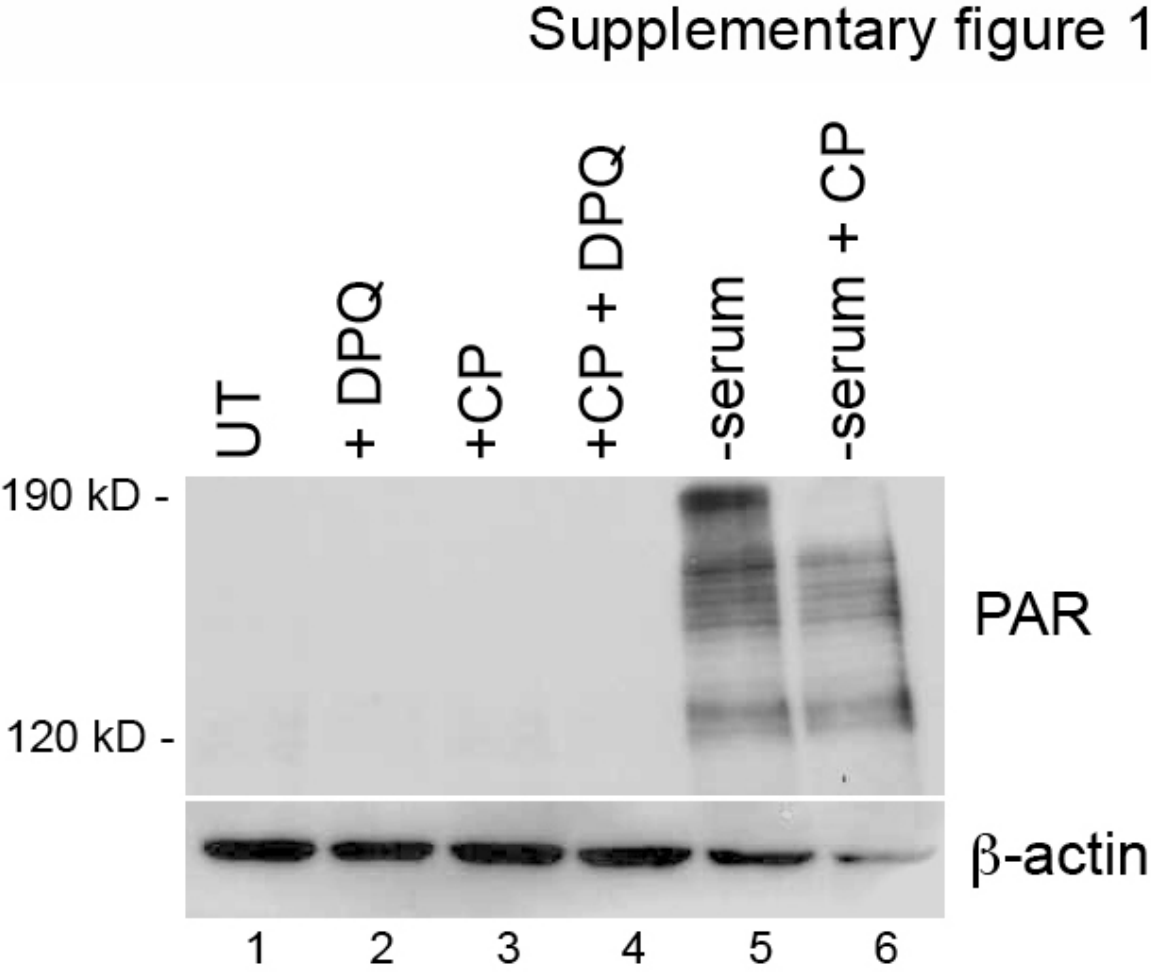

Supplement: NIHMS251118-supplement-Supp__Fig__1.pdf [file NIHMS251118-supplement-Supp__Fig__1.pdf]
